# Supplementary material for: Culture Degeneration Reduces Sex-Related Gene Expression, Alters Metabolite Production and Reduces Insect Pathogenic Response in Cordyceps militaris
Source: MDPI journal article supplement (doi:10.3390/microorganisms9081559), 2021-07-22
Supplement: s1 [file s1]

## SUPPLEMENTARY FIGURES

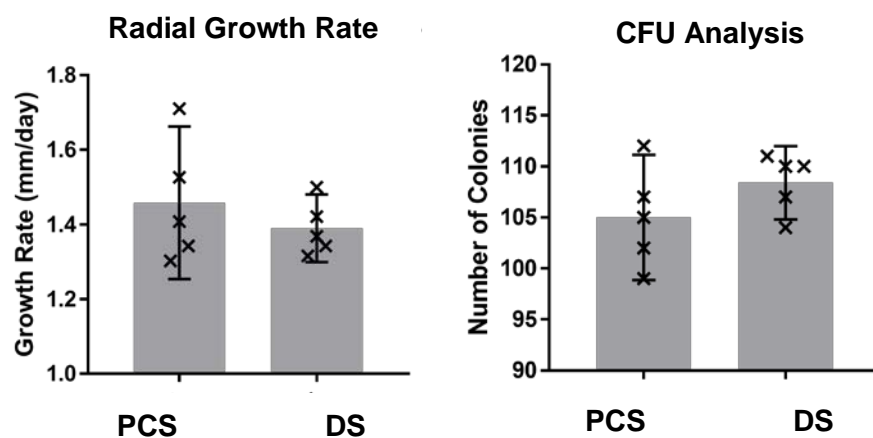

**Supplementary Figure S1: Growth rates of *CM2* parental control (PCS) and degenerated (DS) strains on PDA plates.** Left: radial growth rate after 20 days from subculture; right: colony forming unit analysis. Error bars show 95% confidence intervals of means, from five biological replicates.

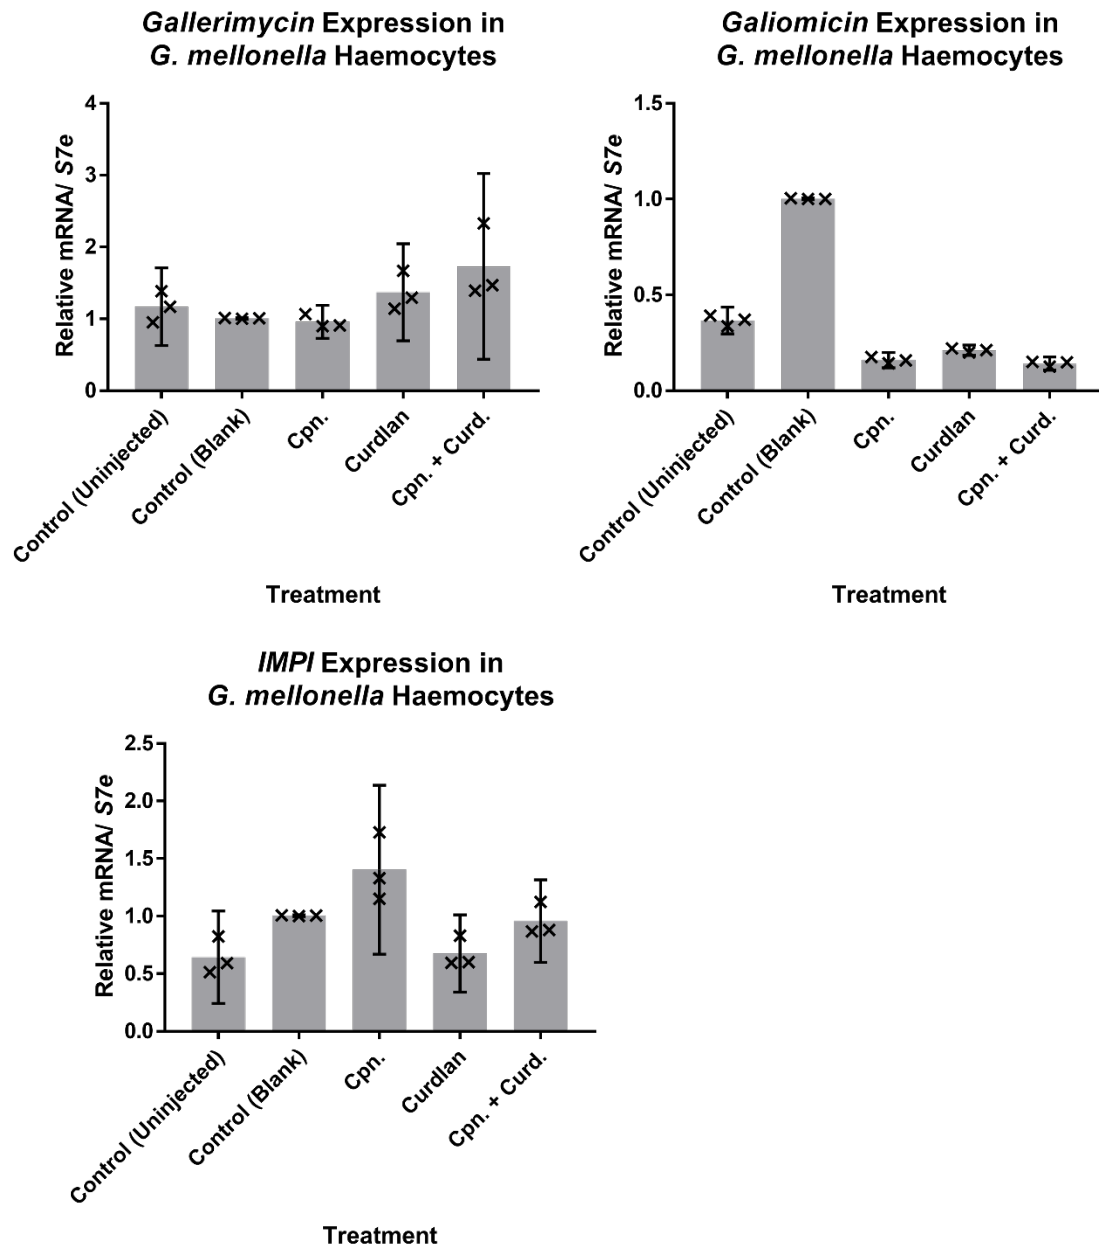

**Supplementary Figure S2: *Gallerimycin*, *Galiomicin*, and *IMPI* expression in *Galleria mellonella* haemocytes following injection by curdlan (curd.), with treatments of additional cordycepin (cpn.) and pentostatin (ptn.).** Three biological replicates, with each point an average of three technical replicates. In all cases, according to t-tests with Bonferroni corrections, there was no significant stimulation by curdlan compared to the negative controls (uninjected and blank).

|         |        |      |      |      |     |     |       |
|---------|--------|------|------|------|-----|-----|-------|
| CM2     | CM2    |      |      | TBRC |     |     | ARSEF |
| Control | Degen. | CM16 | CM17 | 5457 | SR2 | SR3 | 11703 |

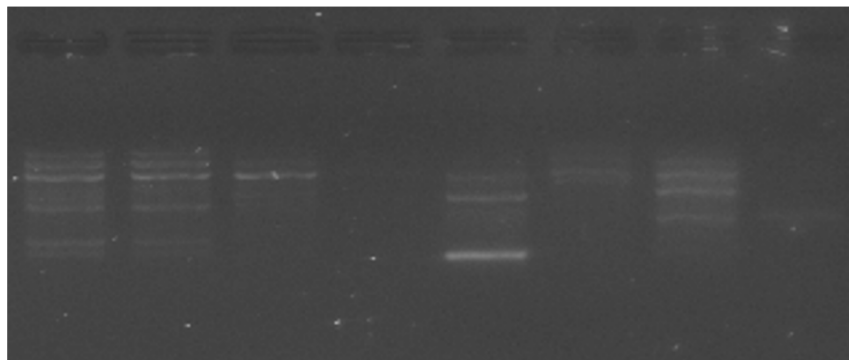

|      |        |      |       |      |      |      |      |         |
|------|--------|------|-------|------|------|------|------|---------|
|      | CBS    | KCTC | BCRC  | NBRC | TBRC |      | TBRC | Neg.    |
| UKMS | 128.25 | 6064 | 32219 | 9787 | 5106 | CM18 | 6804 | Control |

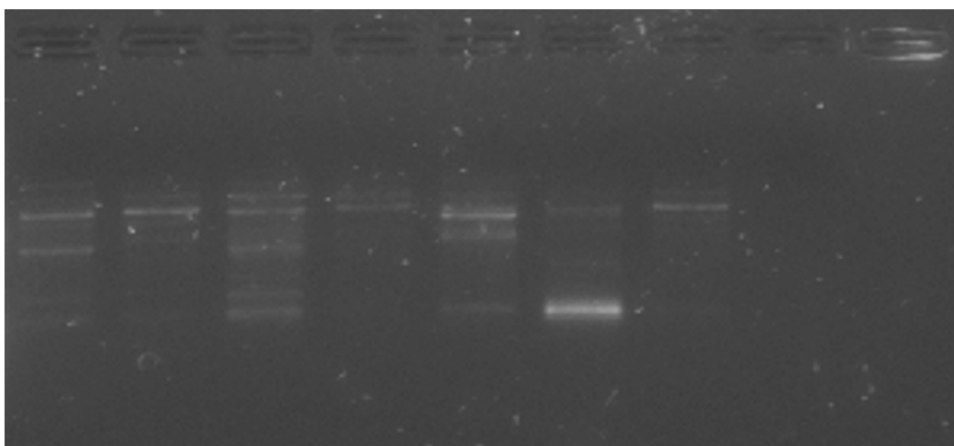

### ***RAPD S62***

**Supplementary Figure S3: RAPDs PCR screens of various *Cordyceps militaris* strains and isolates using the *RAPD S62* primers.**

# **LC-MS(/MS): Fragmentation Spectra of Cordycepin and Pentostatin** **QC SAMPLES** **STANDARD**

**Cordycepin (MS<sup>2</sup> negative mode)**

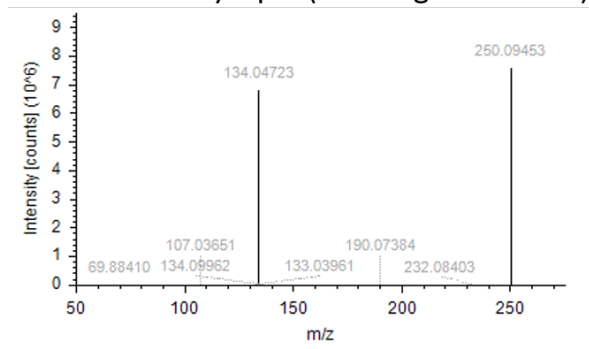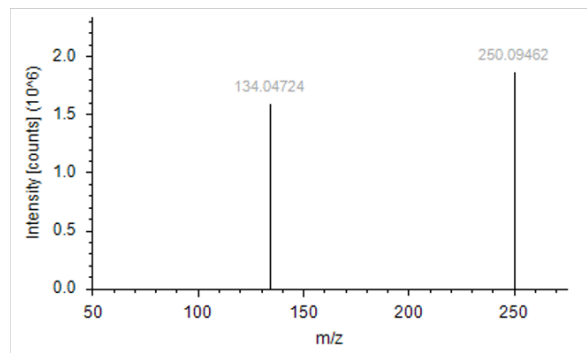

**Pentostatin (MS<sup>1</sup> positive mode)**

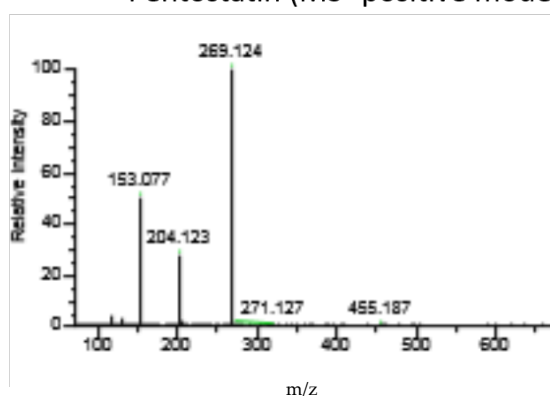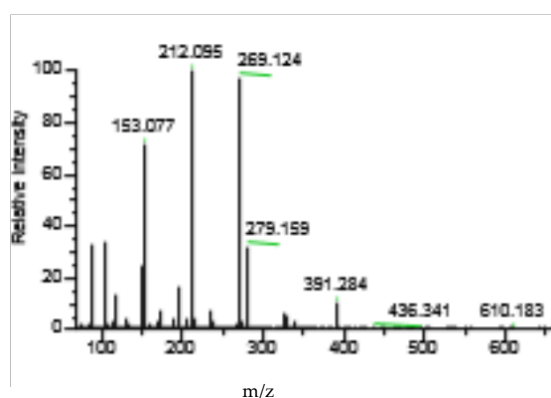

**Supplementary Figure S4: Fragmentation mass spectra of cordycepin and pentostatin, using tandem MS (MS/MS) and standard MS respectively.** Metabolomics Standards Initiative level 1 identification of these metabolites is confirmed by comparison of these spectra for the *C. militaris* QC samples with those of the standards used for quantification.
